# Supplementary material for: Exploring the nattokinase production of Kurthia gibsonii VITAM20 isolated from butcher soil and its complete genome analysis
Source: Research Square preprint supplement (doi:10.21203/rs.3.rs-7204872/v1), 2025-08-26
Supplement: Supplementary file 1 [file 8a5c49456fb6731ba27cdd14.xlsx]

## Sheet: Sheet1
Pathways		Gene count for VITAM20
Metabolism	Carbohydrate metabolism	143
	Energy metabolism	90
	Lipid metabolism	49
	Nucleotide metabolism	87
	Amino acid metabolism	184
	Metabolism of other amino acids	52
	Glycan biosynthesis and metabolism	33
	Metabolism of cofactors and Vitamins	148
	Metabolism of terpenoids and polyketides	27
	Biosythesis of secondary metabolites	29
	Xenobiotics biodegradation and metabolism	19
Genetic information processing	Transcription	8
	Translation	81
	Foling, Sorting, and Degradation	42
Replication and repair	55
Environmental information processing	Membrane transport	111
	Signal transduction	91
	Signaling molecules and interaction	0
Cellular process	Transport and catabolism	4
	Cell growth and death	14
	Cellular community-prokaryotes	45
	Cell motility	43
Organismal systems	Environmental adaptation	4
